# Supplementary material for: Anti-Inflammatory (M2) Response Is Induced by a sp2-Iminosugar Glycolipid Sulfoxide in Diabetic Retinopathy
Source: PubMed Central journal article supplement (PMC8013727; doi:10.3389/fimmu.2021.632132), 2021-03-18
Supplement: Image_1.pdf [file Image_1.pdf]

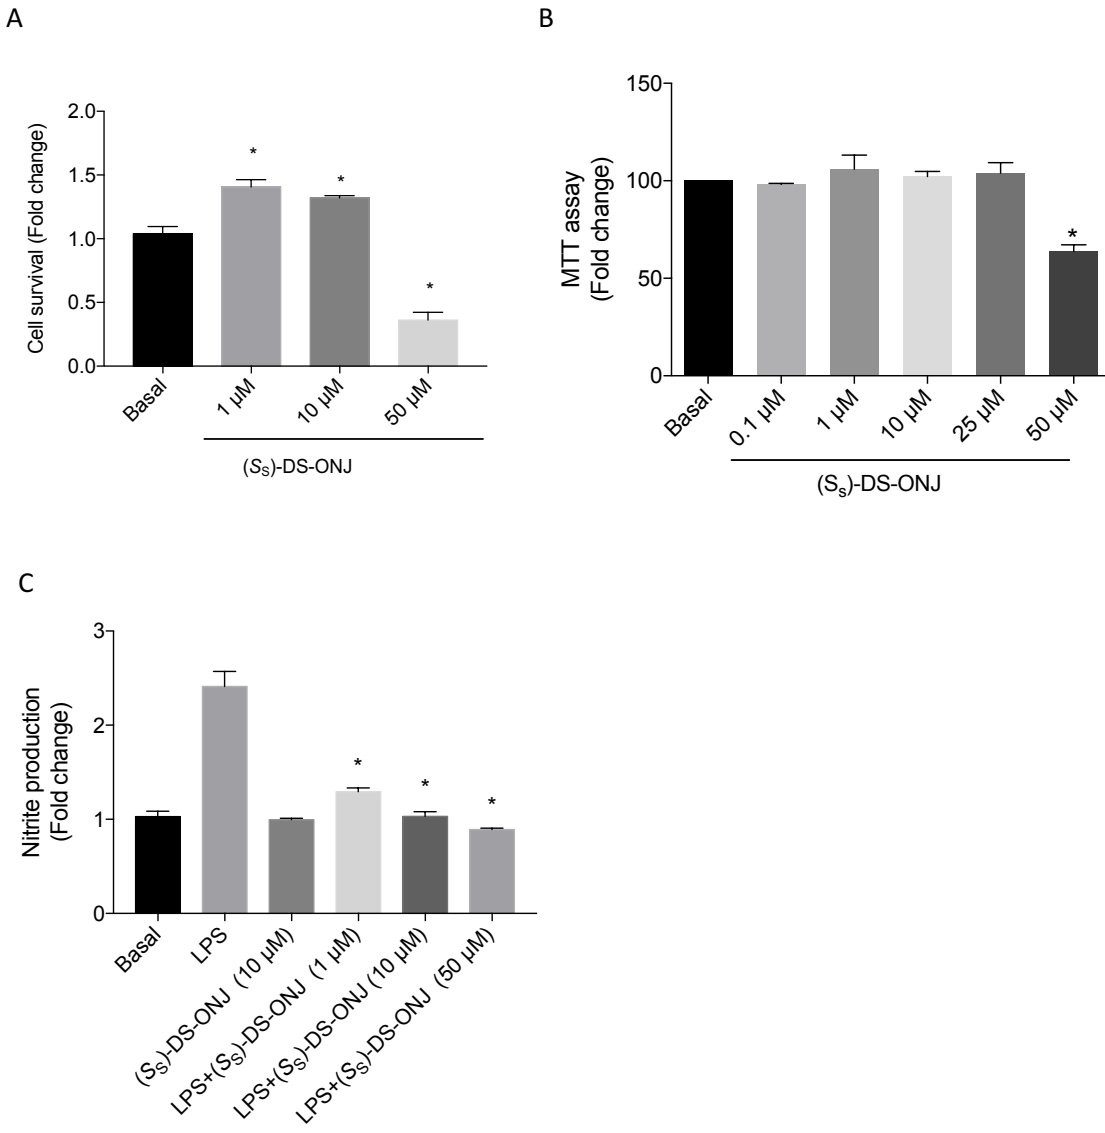

Supplementary Figure 1: Effect of (S<sub>S</sub>)-DS-ONJ dose-response in the cellular viability and nitrites production in Bv.2 microglial cells. Bv.2 microglial cells were treated for 24 h with (S<sub>S</sub>)-DS-ONJ (1–50 μM) viability was determined by A) crystal violet staining and B) MTT assay. B) Bv.2 microglial cells were treated for 24 h with LPS (200 ng/mL) or LPS plus (S<sub>S</sub>)-DS-ONJ (1–50 μM). The results are presented as mean ± SEM (n = 5 independent experiments). The fold changes are presented as relative to the basal value. \*p ≤ 0.05 vs LPS treatment (two-way ANOVA followed by Bonferroni t-test).
