# Supplementary material for: Anti-Inflammatory (M2) Response Is Induced by a sp2-Iminosugar Glycolipid Sulfoxide in Diabetic Retinopathy
Source: PubMed Central journal article supplement (PMC8013727; doi:10.3389/fimmu.2021.632132), 2021-03-18
Supplement: Image_2.pdf [file Image_2.pdf]

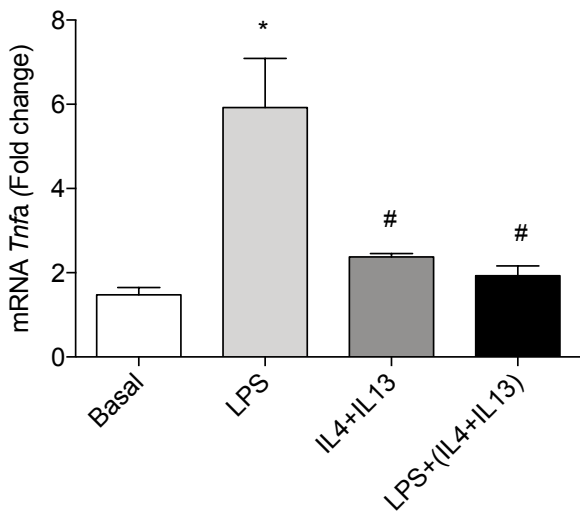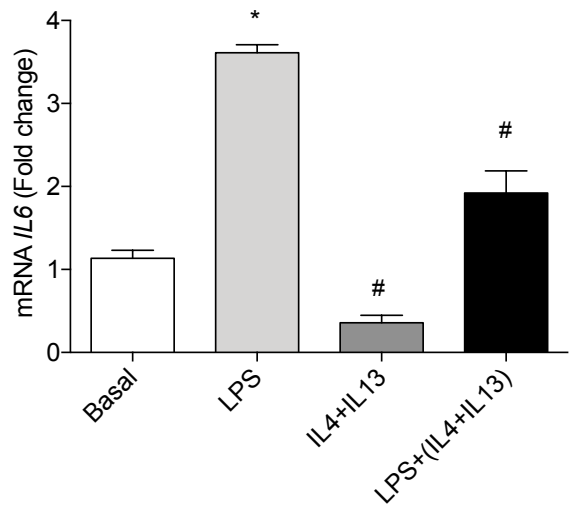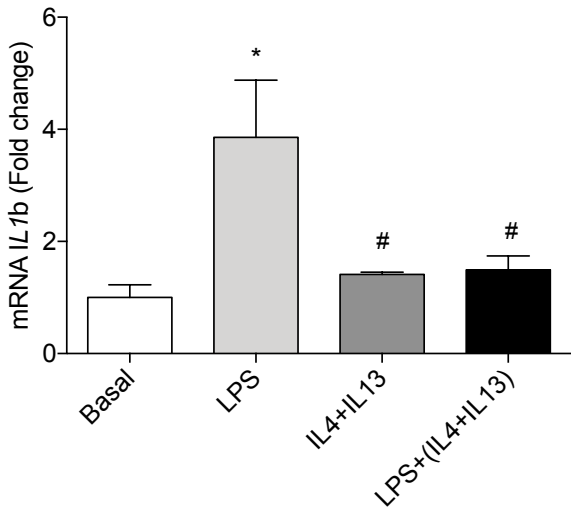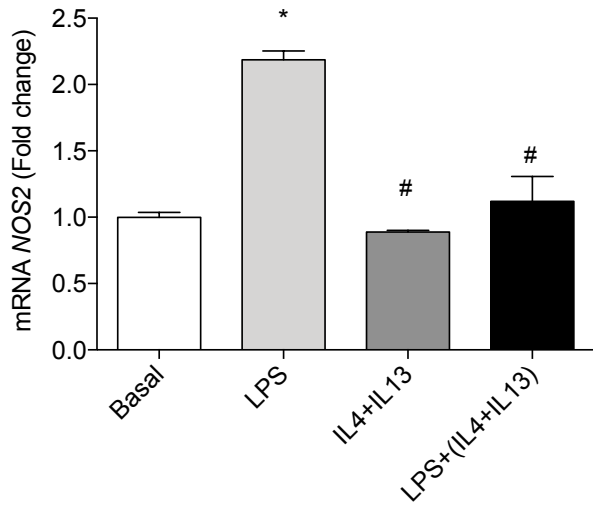

Supplementary Figure 2: Bv.2 microglial cells were treated for 24 h with LPS (200 ng/mL) or LPS plus IL4+IL13 mRNA of *Nos2*, *Tnfa*, *Il1b*, and *Il6* mRNA was determined by qRT-PCR. The results are presented as means  $\pm$  SEM ( $n = 6$  independent experiments). Fold changes are calculated relative to the basal value. \* $p \leq 0.05$  vs Basal treatment, # $p \leq 0.05$  vs LPS value (two-way ANOVA followed by Bonferroni t-test.)
